# Supplementary material
Source: PubMed Central journal article supplement (PMC7743908)
Supplement: supp_8.4.E819_2020-0165-1-at.pdf [file supp_8.4.E819_2020-0165-1-at.pdf]

**Appendix 1 (as supplied by the authors):** Day 14 clinical reassessment/symptom review electronic medical record (EMR) template for patients who tested positive for COVID-19

**COVID+ Clinical check in**

Date of arrival in Canada:

Date of SARS-CoV-2 testing:

Date of any symptom onset:

**Symptoms present at any time during 14-day period after testing (note Y/N):**

Cough:

Fever:

Shortness of breath/difficulty breathing:

Chills:

Muscle pain:

Headache:

Sore throat:

New loss of taste:

New loss of smell:

New nasal congestion:

Diarrhea:

Malaise:

Dizziness:

Nausea and/or vomiting:

Chest pain/tightness:

Other:

**Current symptoms TODAY on day 14 after testing (mark Y/N):**

Cough:

Fever:

Shortness of breath/difficulty breathing:

Chills:

Muscle pain:

Headache:

Sore throat:

New loss of taste:

New loss of smell:

New nasal congestion:

Diarrhea:

Malaise:

Dizziness:

Nausea and/or vomiting:

Chest pain/tightness:  
Other:

Hospitalization at any time during 14 days after testing (if yes, detail duration & location):  
ICU admission at any time during 14 days after testing (if yes, detail duration & location):  
Intubation at any time during 14 days after testing (if yes, detail duration & location):

Additional medical needs:
