# Supplementary material
Source: PubMed Central journal article supplement (PMC7743908)
Supplement: supp_8.4.E819_2020-0165-original-submission.pdf [file supp_8.4.E819_2020-0165-original-submission.pdf]

1  
2  
3  
4 **Clinical Epidemiology of a SARS-CoV-2 Outbreak at a Large Refugee Shelter in Toronto,**  
5 **April 2020**  
6

7 Vanessa Redditt MD,<sup>1,2</sup> Vanessa Wright MScN NP-PHC,<sup>1,3</sup> Meb Rashid MD,<sup>1,2</sup> Roy Male MD,<sup>1</sup>  
8  
9

10 Isaac Bogoch MD MSc<sup>4,5</sup>  
11  
12  
13

14  
15 <sup>1</sup>Crossroads Clinic, Women's College Hospital  
16

17 <sup>2</sup>Department of Family and Community Medicine, University of Toronto  
18

19 <sup>3</sup>Bloomberg School of Nursing, University of Toronto  
20

21 <sup>4</sup>Divisions of General Internal Medicine and Infectious Diseases, University Health Network  
22  
23

24 <sup>5</sup>Faculty of Medicine, University of Toronto  
25  
26  
27  
28  
29  
30  
31  
32  
33  
34

35 **Corresponding author:**  
36

37 Vanessa Redditt, MD  
38 Crossroads Clinic  
39 Women's College Hospital  
40 76 Grenville St  
41 Toronto ON, M5S 1B2  
42 Tel: 647-999-3731  
43 Fax: 416-323-6015  
44 Email: vanessa.redditt@wchospital.ca  
45  
46  
47  
48

49 **Word count (excluding references): 2072**  
50  
51  
52  
53  
54  
55  
56  
57  
58  
59  
60

**Abstract****Background:**

There is high risk of spread of severe acute respiratory syndrome coronavirus 2 (SARS-CoV-2) in congregate settings, including shelters. This study describes a coronavirus disease 2019 (COVID-19) outbreak and corresponding reported symptomatology at one of the largest refugee shelters in Toronto.

**Methods:**

All adult residents on-site at the shelter (n=63) were offered SARS-CoV-2 testing on April 20, 2020. At the time of testing, residents were screened for three typical COVID-19 symptoms (fever, cough, and shortness of breath). Among those who tested positive, a more comprehensive clinical assessment was conducted 1 day after testing and a standardized 15-item symptom screen was administered by phone 14 days after testing. We report rates of positive test results and clinical symptoms with each assessment interval.

**Results:**

Among the 60 adults who underwent testing, 25 (41.6%) were positive for SARS-CoV-2 infection. At the time of testing, 20% of those who tested positive reported fever, cough, or shortness of breath. On more detailed assessment 1 day later, 70.8% reported a broader range of symptoms. During the 14 days following testing, 87.5% reported symptoms of infection.

**Interpretation:**

1  
2  
3 Our study underscores the high risk of SARS-CoV-2 transmission in congregate living settings  
4 and the importance of mobilizing timely testing and management of symptomatic and  
5 asymptomatic residents in shelters. We also found that while most individuals with infection  
6 initially appeared asymptomatic on a basic symptom screen, the majority were presymptomatic  
7 and ultimately developed symptoms of COVID-19, pointing to the value of evaluating for  
8 diverse symptoms suggestive of infection.  
9  
10  
11  
12  
13  
14  
15  
16  
17  
18  
19  
20  
21  
22  
23  
24  
25  
26  
27  
28  
29  
30  
31  
32  
33  
34  
35  
36  
37  
38  
39  
40  
41  
42  
43  
44  
45  
46  
47  
48  
49  
50  
51  
52  
53  
54  
55  
56  
57  
58  
59  
60

Confidential

## Introduction

Severe acute respiratory syndrome coronavirus 2 (SARS-CoV-2) infection can spread rapidly within congregate living settings.(1–4) Homeless shelters, like long-term care facilities and other congregate settings, are densely populated environments, posing difficulties for physical distancing and intensifying risks for infectious disease outbreaks. Toronto, like numerous other cities, is experiencing coronavirus disease 2019 (COVID-19) outbreaks in homeless shelters.(5)

Approximately 235,000 individuals experience homelessness in Canada annually, though the actual number may be much higher.(6) According to the nationally coordinated ‘Point-in-Time (PiT) Count of Homelessness in Canadian Communities’ in 2018, 14% of homeless individuals identified as coming to Canada as immigrants, refugees, or refugee claimants.(7) Refugee claimants, elsewhere known as asylum seekers, arrive to Canada seeking safety from persecution. In 2019, 58,378 claimants sought refuge in Canada.(8) The majority of refugee claimants spend several months in shelters while they seek independent housing. We report an outbreak response to COVID-19 at one of the largest refugee shelters in Toronto and the clinical epidemiology of infection in this population.

## Methods

### *Setting*

A COVID-19 outbreak occurred at a downtown shelter that provides temporary housing to refugee claimants and can accommodate approximately 90 people across two of its linked emergency shelter sites. Residents live in shared rooms with 2 to 6 people, which include shared bathrooms, and eat prepared meals in a shared dining room. The Crossroads Refugee Clinic at

1  
2  
3 Women's College Hospital (WCH) has a long-standing partnership with this shelter, including  
4 an on-site shelter-based primary care clinic run by Crossroads Refugee Clinic. Refugee claimants  
5 receive health care coverage through the Interim Federal Health Program (IFHP), which provides  
6 comprehensive coverage for basic medical services, including physician consultations,  
7 laboratory tests, diagnostic imaging, and hospital services, similar to Canadian public provincial  
8 health insurance, and supplementary coverage for medications and other services and devices,  
9 similar to coverage through provincial social assistance programs.(9) During COVID-19, the  
10 Ontario government expanded health care coverage to all individuals, regardless of health  
11 insurance or immigration status.(10)  
12  
13  
14  
15  
16  
17  
18  
19  
20  
21  
22  
23  
24  
25

### 26 ***Outbreak response and clinical follow-up***

27  
28 In response to a COVID-19 outbreak at this refugee shelter, the Crossroads Refugee Clinic and  
29 WCH's mobile COVID-19 testing team were invited to support on-site SARS-CoV-2 testing and  
30 post-testing management for shelter residents. On April 20, 2020, adults aged 18 and older  
31 residing at the shelter were offered SARS-CoV-2 testing with nasopharyngeal swab. Twenty-  
32 four of the total 87 shelter residents were off-site in isolation facilities at the time of testing and  
33 were excluded from this study, including 10 individuals previously diagnosed with COVID-19  
34 and 14 individuals identified as close contacts. Nasopharyngeal swabs were performed by WCH  
35 clinicians and sent for SARS-CoV-2 polymerase chain reaction (PCR) testing. At the time of  
36 testing, clinicians screened each participant for the presence of three typical COVID-19  
37 symptoms: fever, cough, and shortness of breath.  
38  
39  
40  
41  
42  
43  
44  
45  
46  
47  
48  
49  
50  
51  
52  
53  
54  
55  
56  
57  
58  
59  
60

1  
2  
3 On April 21, 2020, the clinical team conducted a more detailed clinical assessment for those  
4 individuals who tested positive for SARS-CoV-2, including measurement of vital signs and  
5 open-ended questioning regarding COVID-19 symptoms, date of symptom onset, and past  
6 medical history. Individuals who tested positive were transferred to a COVID-19 isolation  
7 facility with on-site medical support for 14-day isolation.  
8  
9  
10  
11  
12  
13

14  
15  
16  
17 Fourteen days after testing, individuals who tested positive were phoned by the clinical team for  
18 reassessment, including a standardized screen for the presence of 15 symptoms (see table 2) at  
19 any time during the preceding two weeks and on day 14 post-testing. The 15-item symptom  
20 screen was based on Centre for Disease Control (CDC) list of COVID-19 related symptoms,(11)  
21 as well as other symptoms emerging in the literature at the time of assessment.(4)  
22  
23  
24  
25  
26  
27  
28  
29

### 30 31 ***Data extraction***

32  
33 Data was manually extracted through retrospective chart review of electronic medical records  
34 (EMR), including scanned documents, and a paper-based record of shelter residents and test  
35 results. Data was entered into an Excel spreadsheet by VR and a research assistant. Selected  
36 variables included basic demographic factors (age and sex), SARS-CoV-2 PCR test results,  
37 symptoms at the time of testing (fever, cough, shortness of breath), and symptoms one day after  
38 testing and on reassessment 14 days post-testing (15-item symptom screen).  
39  
40  
41  
42  
43  
44  
45  
46  
47  
48

### 49 ***Statistical analysis***

50  
51 Descriptive statistics, including counts, proportions, means, and standard deviations, were  
52 calculated using Microsoft Excel software.  
53  
54  
55  
56  
57  
58  
59  
60

### ***Ethics approval***

This study was approved by the WCH Research and Ethics Board, with a waiver of informed consent.

### **Results**

Sixty out of 63 residents on-site at the shelter underwent SARS-CoV-2 testing and basic symptom screening on April 20, 2020. The mean age of participants was 37.1 years and 80% were male (Table 1). Twenty-five individuals (41.6%) tested positive for SARS-CoV-2. At the time of testing, 6 (10%) individuals screened positive for fever, cough, or shortness of breath that same day. Five of the 6 individuals who reported symptoms were found to have positive SARS-CoV-2 tests.

On April 21, 2020, upon more detailed clinical assessment among those who tested positive, 17 of 24 (70.8%) reported at least one symptom consistent with SARS-CoV-2 infection. Headache (33.3%), fever (28%), and myalgias (25%) were the most commonly reported symptoms (Table 2).

During the two weeks following testing, 21 of 24 (87.5%) individuals reported experiencing at least one symptom consistent with SARS-CoV-2 infection. The most commonly reported symptoms were headache (58.3%), loss of taste (41.7%), loss of smell (29.2%), and myalgias (25%). On day 14 post-testing, 9 (37.5%) reported the presence of at least one symptom: loss of

1  
2  
3 taste (12.5%) and myalgias (8.3%) were most common. We could not reach one individual until  
4  
5 day 15 post-testing, but responses reflected symptoms over the preceding 14 days.  
6  
7  
8  
9

10 One patient who tested positive for SARS-CoV-2 was sent to the emergency department at the  
11 time of testing to rule out malaria due to documented fever and headache and origin from a  
12 malaria endemic region. His test for SARS-CoV-2 subsequently returned positive and he was  
13  
14 discharged from the emergency department but we were unable to reach the patient for  
15  
16 reassessment. A single hospitalization was related to isolation requirements rather than clinical  
17  
18 severity; the patient was subsequently discharged to a COVID-19 isolation facility. There were  
19  
20 no cases of intensive care unit admission, intubation, or death. All SARS-CoV-2 positive  
21  
22 residents recovered after 14 days of isolation in the COVID isolation facility with low acuity  
23  
24 symptomatic management.  
25  
26  
27  
28  
29  
30  
31  
32

### 33 **Interpretation**

34  
35 We found a high incidence of SARS-CoV-2 infection (41.6%) on universal testing of on-site  
36  
37 shelter residents. The overall estimated positivity rate among all 87 residents is likely higher,  
38  
39 accounting for individuals who tested positive prior to April 20, 2020 and thereafter.(5) While a  
40  
41 minority (20%) of individuals with SARS-CoV-2 infection reported a narrow range of symptoms  
42  
43 at the time of testing, the majority (87.5%) developed mild symptoms during the subsequent 14  
44  
45 days.  
46  
47  
48  
49  
50

51 These findings are consistent with high infection rates found in other shelter settings where  
52  
53 testing followed identification of a cluster of COVID-19 cases: 36% of shelter residents tested  
54  
55  
56  
57  
58  
59  
60



1  
2  
3 positive for SARS-CoV-2 in a shelter in Boston, 66% in a shelter in San Francisco, and 17%  
4  
5 across 3 shelters in Seattle.(1,2) Common public health interventions to contain COVID-19  
6  
7 spread, such as physical distancing, hand hygiene, timely testing, contact tracing, isolation, and  
8  
9 use of personal protective equipment may be challenging to implement among many people  
10  
11 experiencing homelessness, given physical constraints of shelter settings, limited access to  
12  
13 supplies, and concurrent mental and physical health conditions.(12) Proactive measures,  
14  
15 including increased physical spacing between shelter beds, decreased density within each shelter  
16  
17 through opening additional accommodation facilities, isolation centres for homeless individuals  
18  
19 testing positive for SARS-CoV-2, and on-site assessment and testing with rapid turnaround of  
20  
21 test results, have been shown to help mitigate the risk of COVID-19 outbreaks in other shelter  
22  
23 settings.(13) Collaboration among public health units, local government, shelter operators, and  
24  
25 health providers are key.(13)  
26  
27  
28  
29  
30  
31  
32

33 Few individuals with SARS-CoV-2 infection in our study filled criteria for prior, narrowly  
34  
35 defined COVID-19 symptoms (fever, cough, shortness of breath) at the time of testing. This is  
36  
37 consistent with findings from a shelter outbreak in Boston, in which a minority of shelter  
38  
39 residents with SARS-CoV-2 infection had fever (0.7%), cough (7.5%), or shortness of breath  
40  
41 (1.4%) upon testing.(1) However, most individuals with SARS-CoV-2 in our study (87.5%)  
42  
43 subsequently developed a range of symptoms consistent with infection during the 14 day period  
44  
45 after testing, which were identified on more detailed clinical assessment. Similarly, a study of a  
46  
47 COVID-19 outbreak at a call centre in South Korea demonstrated that only 4.1% of 97 infected  
48  
49 individuals remained completely asymptomatic during a 14 day post-testing period,(14) which is  
50  
51 much lower than the previously estimated asymptomatic ratio of 30.8% based on earlier  
52  
53  
54  
55  
56  
57  
58  
59  
60

1  
2  
3 modeling.(15) Another study of a long-term care skilled nursing facility in Seattle found that  
4 among 13 residents who tested positive for SARS-CoV-2 and were asymptomatic at the time of  
5 testing, 10 went on to develop symptoms one week following testing.(16) These findings  
6  
7 underscore the value of enhanced surveillance for SARS-CoV-2 testing in high-risk settings,  
8 such as shelters, particularly in light of mounting evidence of paucisymptomatic and  
9 presymptomatic spread.(4,16,17,18) Our study also emphasizes the importance of evaluating for  
10 diverse symptoms suggestive of infection.  
11  
12  
13  
14  
15  
16  
17  
18  
19  
20

21 The majority of shelter residents in our study had mild to moderate clinical courses, which may  
22 reflect the relatively young age of this sample and low prevalence of pre-existing comorbidities.  
23  
24 In the general homeless population, many individuals are older and have underlying health  
25 conditions, increasing their risk of severe COVID-19-related complications.(12,19,20)  
26  
27  
28  
29  
30  
31  
32

33 Our findings also highlight the importance of ensuring access to testing and medical treatment  
34 for all, regardless of immigration or health insurance status. This is particularly poignant as we  
35 witness SARS-CoV-2 outbreaks in other forms of congregate settings, including among migrant  
36 farm workers who are often working and living in crowded conditions and have precarious  
37 employment, immigration, and health insurance status.(21–23)  
38  
39  
40  
41  
42  
43  
44  
45  
46

### 47 ***Limitations***

48  
49 This study describes COVID-19 test results and individuals' clinical courses at a single homeless  
50 shelter. Not all residents were present at the time of SARS-CoV-2 testing and subsequent test  
51 results completed after April 20, 2020 were not available to the research team. Rates of SARS-  
52  
53  
54  
55  
56  
57  
58  
59  
60

1  
2  
3 CoV-2 infection and clinical courses may be highly variable across different shelter settings and  
4  
5 homeless populations.  
6  
7  
8  
9

10 While we conducted limited symptom screening on day 1, comprehensive clinical assessment on  
11  
12 day 2, and retrospective symptom evaluation on day 14, daily comprehensive symptom screening  
13  
14 may have provided a more accurate depiction of symptom emergence and evolution during the  
15  
16 study period, and the day 14 symptom screen is prone to recall bias.  
17  
18  
19  
20

### 21 ***Conclusion***

22  
23 Our study underscores the high risk of SARS-CoV-2 transmission in congregate living settings.  
24  
25

26 We also found that most individuals with SARS-CoV-2 infection developed compatible  
27  
28 symptoms of COVID-19, although most had mild symptoms. Our findings highlight the  
29  
30 importance of mobilizing timely testing and management of all residents of shelters where  
31  
32 infection is present, including symptomatic, paucisymptomatic, and asymptomatic (including  
33  
34 those who are presymptomatic) residents. Tailored strategies are critical to respond to the unique  
35  
36 needs of homeless and refugee populations to decrease risks of transmission and manage cases of  
37  
38 infection in congregate settings. Alongside these COVID-19 mitigation interventions, there is a  
39  
40 pressing need for upstream action to address the root causes of homelessness.  
41  
42  
43  
44  
45  
46  
47  
48  
49  
50  
51  
52  
53  
54  
55  
56  
57  
58  
59  
60

1  
2  
3 **Data sharing:** A deidentified data set from the study may be made available to other researchers  
4 who provide a detailed study proposal clearly describing the use of the data and that is approved  
5 by an independent review committee. Researchers who wish to access the study data may contact  
6 the corresponding author, Vanessa Redditt, at [vanessa.redditt@wchospital.ca](mailto:vanessa.redditt@wchospital.ca).  
7  
8  
9  
10  
11  
12  
13

14 **Funding statement:** No funding was received for this study.  
15  
16  
17  
18  
19

20 **Conflicts of interest:** Vanessa Redditt is on the volunteer community board of directors of  
21 Sojourn House. Isaac Bogoch has consulted to BlueDot, a social benefit company that tracks  
22 emerging infectious diseases.  
23  
24  
25  
26

27 **Contributors:** All authors were involved in the conception of the paper and study design.  
28 Vanessa Redditt collected, analysed, and interpreted the data and drafted the manuscript. All of  
29 the authors contributed to data interpretation, revised the manuscript critically for important  
30 intellectual content, approved the final version to be published, and agreed to be accountable for  
31 all aspects of the work.  
32  
33  
34  
35  
36  
37  
38  
39  
40  
41  
42  
43  
44  
45  
46  
47  
48  
49  
50  
51  
52  
53  
54  
55  
56  
57  
58  
59  
60

## References

1. Baggett TP, Keyes H, Sporn N, Gaeta JM. Prevalence of SARS-CoV-2 Infection in Residents of a Large Homeless Shelter in Boston. *JAMA*. 2020;323(21):2191–2.
2. Mosites E, Parker EM, Clarke KEN, Gaeta JM, Baggett TP, Imbert E. Assessment of SARS-CoV-2 Infection Prevalence in Homeless Shelters —Four U.S. Cities, March 27–April 15, 2020. *MMWR Morb Mortal Wkly Rep*. 2020;69(17):521–2.
3. Tobolowsky FA, Gonzales E, Self JL, Rao CY, Keating R, Marx GE. COVID-19 Outbreak Among Three Affiliated Homeless Service Sites — King County, Washington, 2020. *MMWR Morb Mortal Wkly Rep*. 2020;69(17):523–6.
4. Arons MM, Hatfield KM, Reddy SC, Kimball A, James A, Jacobs JR, et al. Presymptomatic SARS-CoV-2 Infections and Transmission in a Skilled Nursing Facility. *N Engl J Med*. 2020;382(22):2081–90.
5. Toronto Public Health. Active COVID-19 Outbreaks in Toronto Shelters and Respite Centres. [Internet]. COVID-19: Status of Cases in Toronto. 2020 [cited 2020 May 6]. Available from: <https://www.toronto.ca/home/covid-19/covid-19-latest-city-of-toronto-news/covid-19-status-of-cases-in-toronto/>
6. Gaetz S, Dej E, Richter T, Redman M. The State of Homelessness in Canada 2016 [Internet]. Toronto: Canadian Observatory on Homelessness Press; 2016. [cited 2020 June 27]. Available from: <https://www.homelesshub.ca/SOHC2016>
7. Employment and Social Development Canada. Everyone Counts 2018: Highlights – Preliminary Results from the Second Nationally Coordinated Point-in-Time Count of Homelessness in Canadian Communities [Internet]. Ottawa: Government of Canada; 2019 [cited 2020 June 27]. Available from: <https://www.canada.ca/en/employment->

- 1  
2  
3 social-development/programs/homelessness/reports/highlights-2018-point-in-time-  
4 count.html#3.5  
5  
6  
7
8. 8. Immigration and Refugee Board of Canada. Refugee Protection Claims by country of  
9 Alleged Persecution - 2019 [Internet]. Ottawa: Government of Canada; 2019 [cited 2020  
10 Jun 27]. Available from: <https://irb-cisr.gc.ca/en/statistics/protection/Pages/RPDStat.aspx>  
11  
12  
13
  9. 9. Government of Canada. Interim Federal Health Program: Summary of coverage  
14 [Internet]. Ottawa: Government of Canada; 2019 [cited 2020 Jun 27]. Available from:  
15 [https://www.canada.ca/en/immigration-refugees-citizenship/services/refugees/help-](https://www.canada.ca/en/immigration-refugees-citizenship/services/refugees/help-within-canada/health-care/interim-federal-health-program/coverage-summary.html)  
16 [within-canada/health-care/interim-federal-health-program/coverage-summary.html](https://www.canada.ca/en/immigration-refugees-citizenship/services/refugees/help-within-canada/health-care/interim-federal-health-program/coverage-summary.html)  
17  
18  
19
  10. 10. Health Services Branch- Ministry of Health. INFOBulletin - Re: COVID-19 Expanding  
20 access to OHIP Coverage and Funding Physican and Hospital Services for Uninsured  
21 Patients [Internet]. OHIP Bulletin 4749. 2020 [cited 2020 Jun 27]. Available from:  
22 <http://www.health.gov.on.ca/en/pro/programs/ohip/bulletins/4000/bul4749.aspx>  
23  
24  
25
  11. 11. Centers for Disease Control and Prevention (CDC). Symptoms of Coronavirus [Internet].  
26 Coronavirus Disease 2019 (COVID-19). 2020 [cited 2020 Apr 27]. Available from:  
27 <https://www.cdc.gov/coronavirus/2019-ncov/symptoms-testing/symptoms.html>  
28  
29  
30  
31  
32
  12. 12. Tsai J, Wilson M. COVID-19: a potential public health problem for homeless  
33 populations. *Lancet Public Heal.* 2020;5(4):e186–7.  
34  
35  
36  
37  
38  
39
  13. 13. Bodkin C, Mokashi V, Beal K, Wiwcharuk J, Lennox R, Guenter D, et al. Pandemic  
40 Planning in Homeless Shelters: A pilot study of a COVID-19 testing and support program  
41 to mitigate the risk of COVID-19 outbreaks in congregate settings. *Clin Infect Dis*  
42 [Internet]. 2020 Jun 8 [cited 2020 June 27]. Available from:  
43 <https://doi.org/10.1093/cid/ciaa743>. Epub ahead of print.  
44  
45  
46  
47  
48  
49  
50  
51  
52  
53  
54  
55  
56  
57  
58  
59  
60

- 1  
2  
3 14. Park SY, Kim Y-M, Yi S, Lee S, Na B-J, Kim CB, et al. Coronavirus Disease Outbreak  
4 in Call Center, South Korea. *Emerg Infect Dis* [Internet]. 2020 [cited 2020 June  
5 26];26(8). Available from: <https://doi.org/10.3201/eid2608.201274>. Epub ahead of print.  
6  
7
- 8  
9  
10 15. Nishiura H, Kobayashi T, Miyama T, Suzuki A, Jung S-M, Hayashi K, et al. Estimation  
11 of the asymptomatic ratio of novel coronavirus infections (COVID-19). *Int J Infect Dis*.  
12 2020;94:154–5.  
13  
14
- 15  
16  
17 16. Kimball A, Hatfield KM, Arons M, James A, Taylor J, Spicer K, et al. Asymptomatic and  
18 Presymptomatic SARS-CoV-2 Infections in Residents of a Long-Term Care Skilled  
19 Nursing Facility — King County, Washington, March 2020. *MMRW Morb Mortal Wkly*  
20 *Rep*. 2020;69(13):377–81.  
21  
22
- 23  
24  
25  
26 17. Huff H V, Singh A. Asymptomatic transmission during the COVID-19 pandemic and  
27 implications for public health strategies. *Clin Infect Dis* [Internet]. 2020 May 28 [cited  
28 2020 Jul 4]. Available from: <https://doi.org/10.1093/cid/ciaa654>. Epub ahead of print.  
29  
30  
31
- 32  
33 18. Furukawa NW, Brooks JT, Sobel J. Evidence Supporting Transmission of Severe Acute  
34 Respiratory Syndrome Coronavirus 2 While Presymptomatic or Asymptomatic. *Emerg*  
35 *Infect Dis*. 2020;26(7):13–7.  
36  
37
- 38  
39  
40 19. Fazel S, Geddes JR, Kushel M. The health of homeless people in high-income countries:  
41 Descriptive epidemiology, health consequences, and clinical and policy  
42 recommendations. *Lancet*. 2014;384(9953):1529–40.  
43  
44
- 45  
46  
47 20. Aldridge RW, Story A, Hwang SW, Nordentoft M, Luchenski SA, Hartwell G, et al.  
48 Morbidity and mortality in homeless individuals, prisoners, sex workers, and individuals  
49 with substance use disorders in high-income countries: a systematic review and meta-  
50 analysis. *Lancet*. 2018;391(10117):241–50.  
51  
52  
53  
54  
55  
56  
57  
58  
59  
60

- 1  
2  
3 21. Temporary foreign worker dies due to COVID-19 as disease hits southwestern Ontario  
4 farms hard. CBC News [Internet]. 2020 Jun 1 [cited 2020 June 27]. Available from:  
5  
6 [https://www.cbc.ca/news/canada/windsor/southwestern-ontario-farms-covid19-migrant-  
9  
10 worker-dies-1.5593046](https://www.cbc.ca/news/canada/windsor/southwestern-ontario-farms-covid19-migrant-7<br/>8 worker-dies-1.5593046)  
11
- 12 22. Assessment centre for migrant workers opens in Leamington, following 2 COVID-19  
13 deaths. CBC News [Internet]. 2020 Jun 9 [cited 2020 June 27]. Available from:  
14  
15 [https://www.cbc.ca/news/canada/windsor/assessment-centre-migrant-workers-covid19-  
18  
19 windsor-essex-1.5603a400](https://www.cbc.ca/news/canada/windsor/assessment-centre-migrant-workers-covid19-16<br/>17 windsor-essex-1.5603a400)  
20
- 21 23. Rodriguez, S. Third Ontario migrant worker dies of COVID-19. CBC News [Internet].  
22  
23 2020 Jun 21 [cited 2020 June 27]. Available from:  
24  
25 [https://www.cbc.ca/news/canada/london/third-ontario-migrant-worker-dies-of-covid-19-  
28  
29 1.5621487](https://www.cbc.ca/news/canada/london/third-ontario-migrant-worker-dies-of-covid-19-26<br/>27 1.5621487)  
30  
31  
32  
33  
34  
35  
36  
37  
38  
39  
40  
41  
42  
43  
44  
45  
46  
47  
48  
49  
50  
51  
52  
53  
54  
55  
56  
57  
58  
59  
60



**Table 1. Characteristics and initial symptoms of shelter residents who underwent SARS-CoV-2 testing on Apr 20, 2020**

| Characteristics             | No. (%)                 |                                                          |                                                            |
|-----------------------------|-------------------------|----------------------------------------------------------|------------------------------------------------------------|
|                             | All Residents<br>(n=60) | Residents with<br>Positive SARS-<br>CoV-2 swab<br>(n=25) | Residents with<br>Negative<br>SARS-CoV-2<br>swab<br>(n=35) |
| Age, mean (SD), years       | 36.0 (10.0)             | 38.7 (11.0)                                              | 34.1 (8.8)                                                 |
| Sex                         |                         |                                                          |                                                            |
| Male                        | 48 (80)                 | 22 (88)                                                  | 26 (74.3)                                                  |
| Female                      | 12 (20)                 | 3 (12)                                                   | 9 (25.7)                                                   |
| Symptoms at time of testing |                         |                                                          |                                                            |
| Fever                       | 3 (5)                   | 2 (8)                                                    | 1 (2.9)                                                    |
| Cough                       | 3 (5)                   | 3 (12)                                                   | 0                                                          |
| Shortness of breath         | 0                       | 0                                                        | 0                                                          |

**Table 2. Clinical symptoms of shelter residents who tested positive for SARS-CoV-2 testing on Apr 20, 2020 (n=24)<sup>a</sup>**

| Clinical symptoms      | No. (%)               |                                      |                        |
|------------------------|-----------------------|--------------------------------------|------------------------|
|                        | On day 1 post-testing | Any time during 14 days post-testing | On day 14 post-testing |
| Asymptomatic           | 7 (29.1)              | 3 (12.5)                             | 15 (62.5)              |
| Any symptoms           | 17 (70.8)             | 21 (87.5)                            | 9 (37.5)               |
| Fever                  | 7 (29.1)              | 8 (33.3)                             | 0                      |
| Cough                  | 6 (25)                | 5 (20.8)                             | 1 (4.2)                |
| Shortness of breath    | 0                     | 1 (4.2)                              | 0                      |
| Chills                 | 2 (8.3)               | 3 (12.5)                             | 0                      |
| Myalgias               | 6 (25)                | 6 (25)                               | 2 (8.3)                |
| Headache               | 8 (33.3)              | 14 (58.3)                            | 0                      |
| Sore throat            | 6 (25)                | 6 (25)                               | 0                      |
| New loss of taste      | 1 (4.2)               | 10 (41.7)                            | 3 (12.5)               |
| New loss of smell      | 1 (4.2)               | 7 (29.2)                             | 0                      |
| New nasal congestion   | 1 (4.2)               | 6 (25)                               | 1 (4.2)                |
| Diarrhea               | 1 (4.2)               | 3 (12.5)                             | 0                      |
| Malaise                | 3 (12.5)              | 5 (20.8)                             | 1 (4.2)                |
| Dizziness              | 1 (4.2)               | 4 (16.7)                             | 1 (4.2)                |
| Nausea and/or vomiting | 0                     | 2 (8.3)                              | 1 (4.2)                |
| Chest pain/tightness   | 1 (4.2)               | 4 (16.7)                             | 0                      |
| Other                  | 3 (12.5)              | 8 (33.3)                             | 2 (8.3)                |

<sup>a</sup> One individual could not be contacted after initial testing.
